# Supplementary material for: Hydrogenation of TiO2 nanosheets and nanoparticles: typical reduction stages and orientation-related anisotropic disorder
Source: Royal Society of Chemistry journal article supplement (doi:10.1039/d1ta05774j), 2021-01-01
Supplement: d1ta05774j1.pdf [file d1ta05774j1.pdf]

Supplementary Information for

**Hydrogenation of TiO<sub>2</sub> Nanosheets and Nanoparticles:  
Typical Reduction Stages and Orientation-relative  
Anisotropic Disordering**

Peiru Zheng<sup>1</sup>, Lishu Zhang<sup>1,2</sup>, Xingfan Zhang<sup>1,3</sup>, Yingjie Ma<sup>1</sup>, Junping Qian<sup>1</sup>, Yanyan  
Jiang<sup>\*,1,4</sup>, Hui Li<sup>\*,1</sup>

<sup>1</sup>Key Laboratory for Liquid-Solid Structural Evolution and Processing of Materials,  
Ministry of Education, Shandong University, Jinan 250061, China

<sup>2</sup>National University of Singapore, Modeling and Simulation Lab, Department of  
Physics, 2 Science Drive 3, Singapore 117542, Singapore

<sup>3</sup>University College London, Kathleen Lonsdale Materials Chemistry, Department of  
Chemistry, 20 Gordon Street, London WC1H 0AJ, United Kingdom

<sup>4</sup>Shenzhen Research Institute of Shandong University, Shenzhen 518057, China

\* Corresponding author:

[yanyan.jiang@sdu.edu.cn](mailto:yanyan.jiang@sdu.edu.cn) (Y. J.); [lihuilmy@hotmail.com](mailto:lihuilmy@hotmail.com) (H. L.)

**This PDF file includes:**

Figure S1 to S5

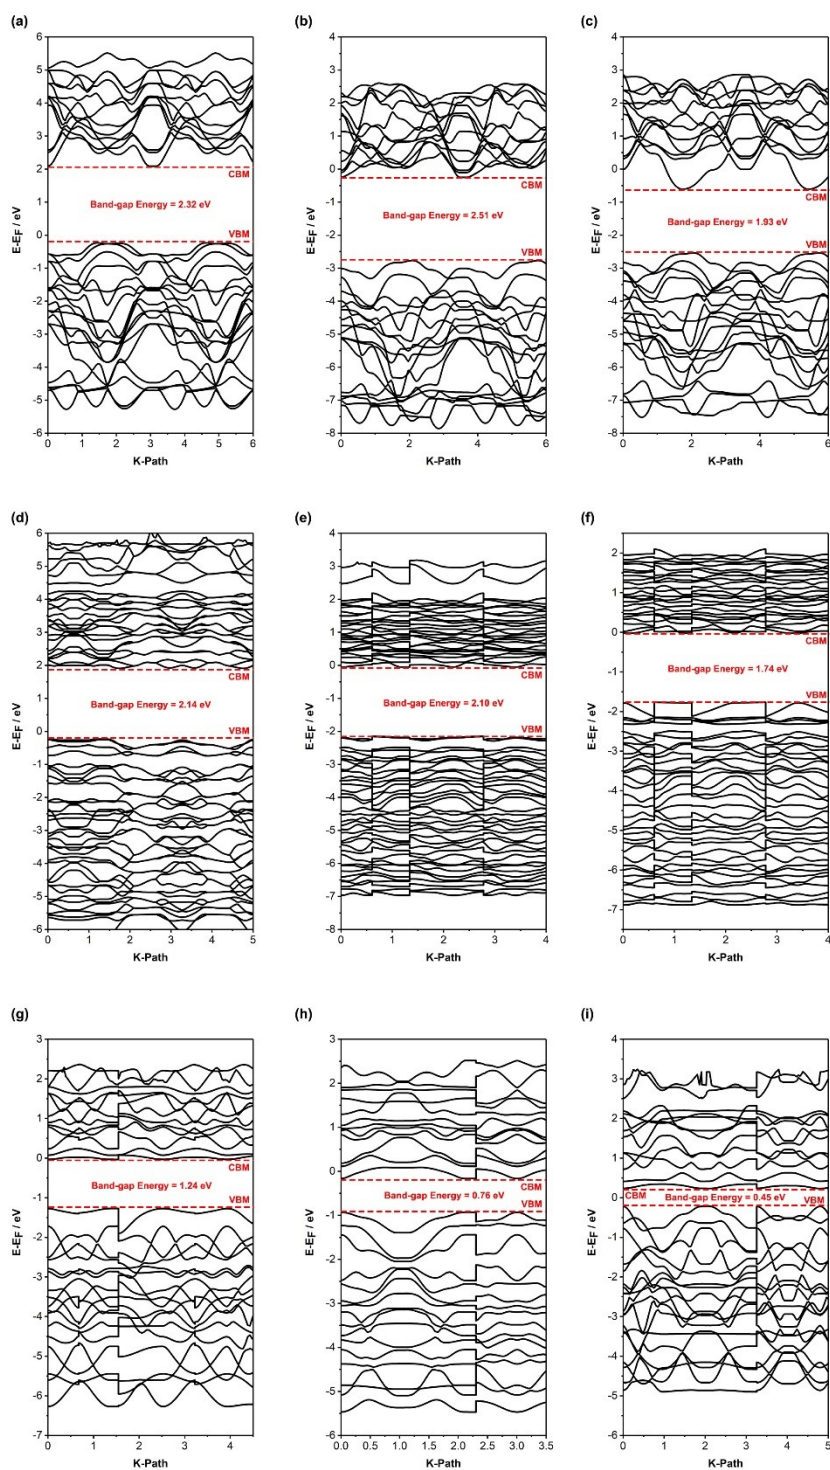

Figure S1 The energy band diagrams of (a) anatase, (b) anatase with  $\text{H}/\text{O}_{2\text{C}}$ , (c) anatase with  $\text{H}/\text{O}_{3\text{C}}$ . (d)(e)(f) denote the counterparts of brookite, and (g)(h)(i) denote the counterparts of rutile.

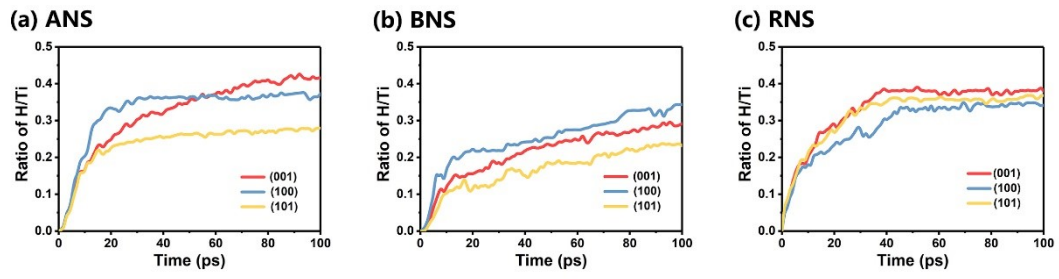

Figure S2 The variation of the ratio of H/Ti during the hydrogenation on the (001), (100), and (101) surfaces of the nanosheets.

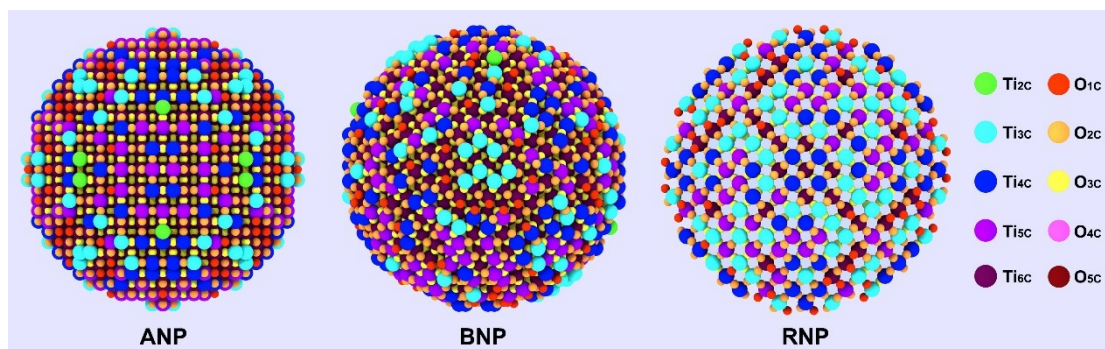

Figure S3 Atomic arrangement of the original modelling ANP, BNP and RNP surface. The surface atoms are painted into different colors according to their coordination numbers.

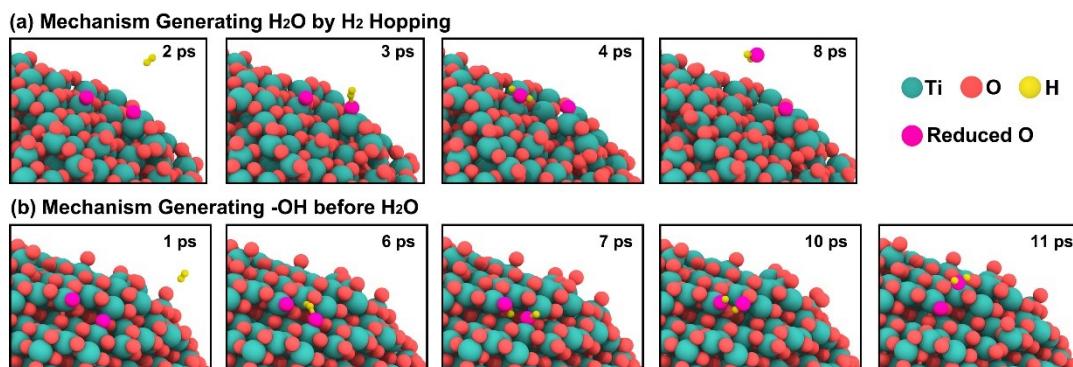

Figure S4 Two typical reduction mechanisms generating H<sub>2</sub>O. Only partial atoms of the nanoparticles and H atoms participating the reduction are shown for distinct identification. The eventually reduced O atoms are colored pink.

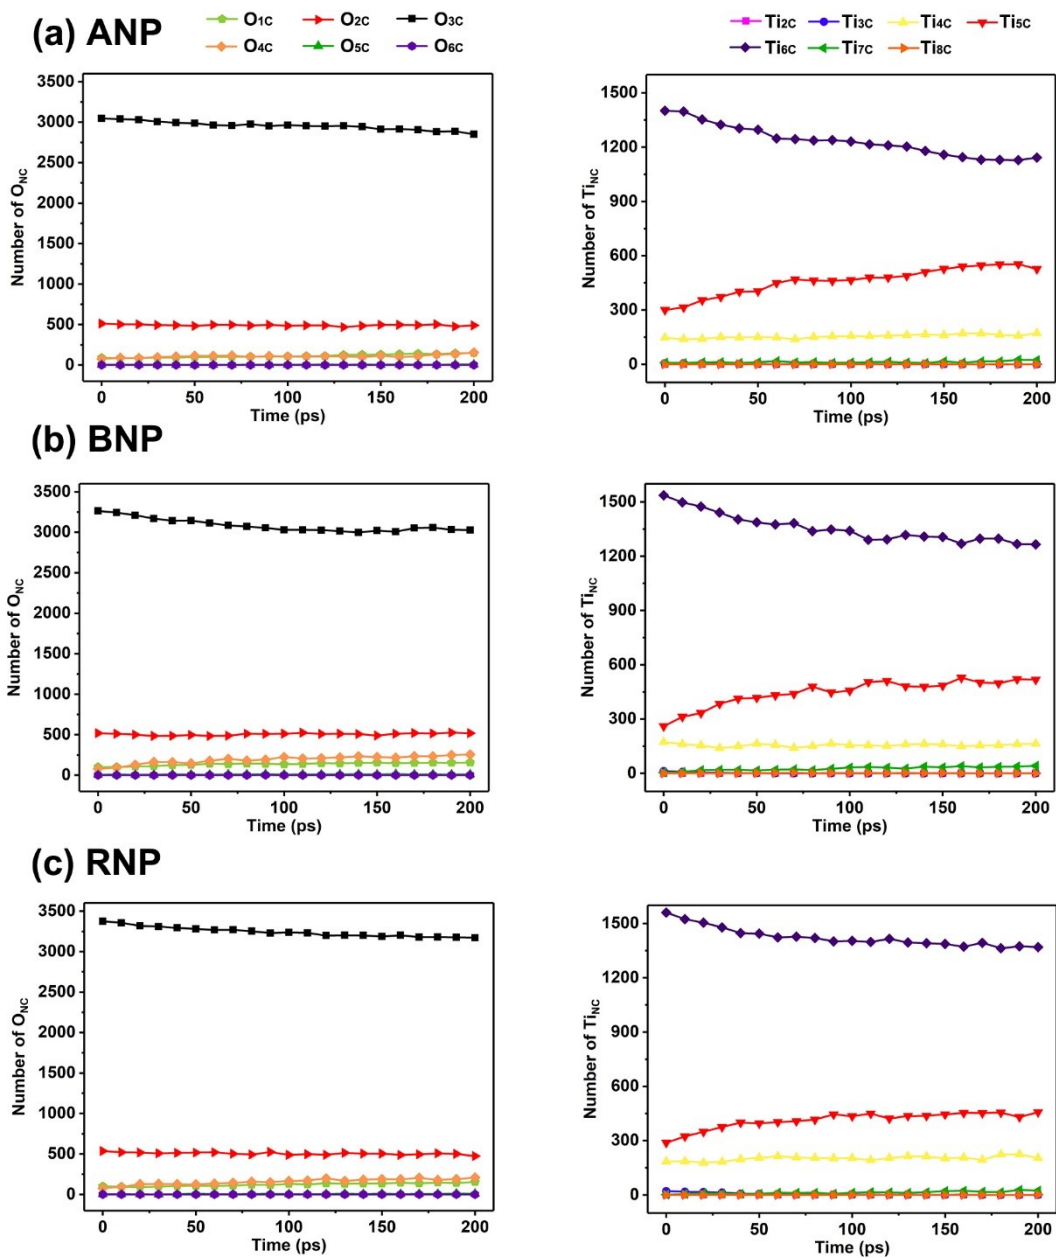

Figure S5 The variations of  $O_{NC}$  ( $N = 1-6$ ),  $Ti_{NC}$  ( $N = 2-8$ ) of (a) ANP, (b) BNP, (c) RNP during the reduction under the environmental setup of 1000 K, 200 atm and 4300  $H_2$ .
